# Supplementary material
Source: MDPI journal article supplement (https://www.mdpi.com/2077-0472/11/8/725)

## Supplementary material

**Figure S1.** Photographic representation of dose-response for the tolerant *Vulpia myuros* and susceptible *Apera spica-venti*.

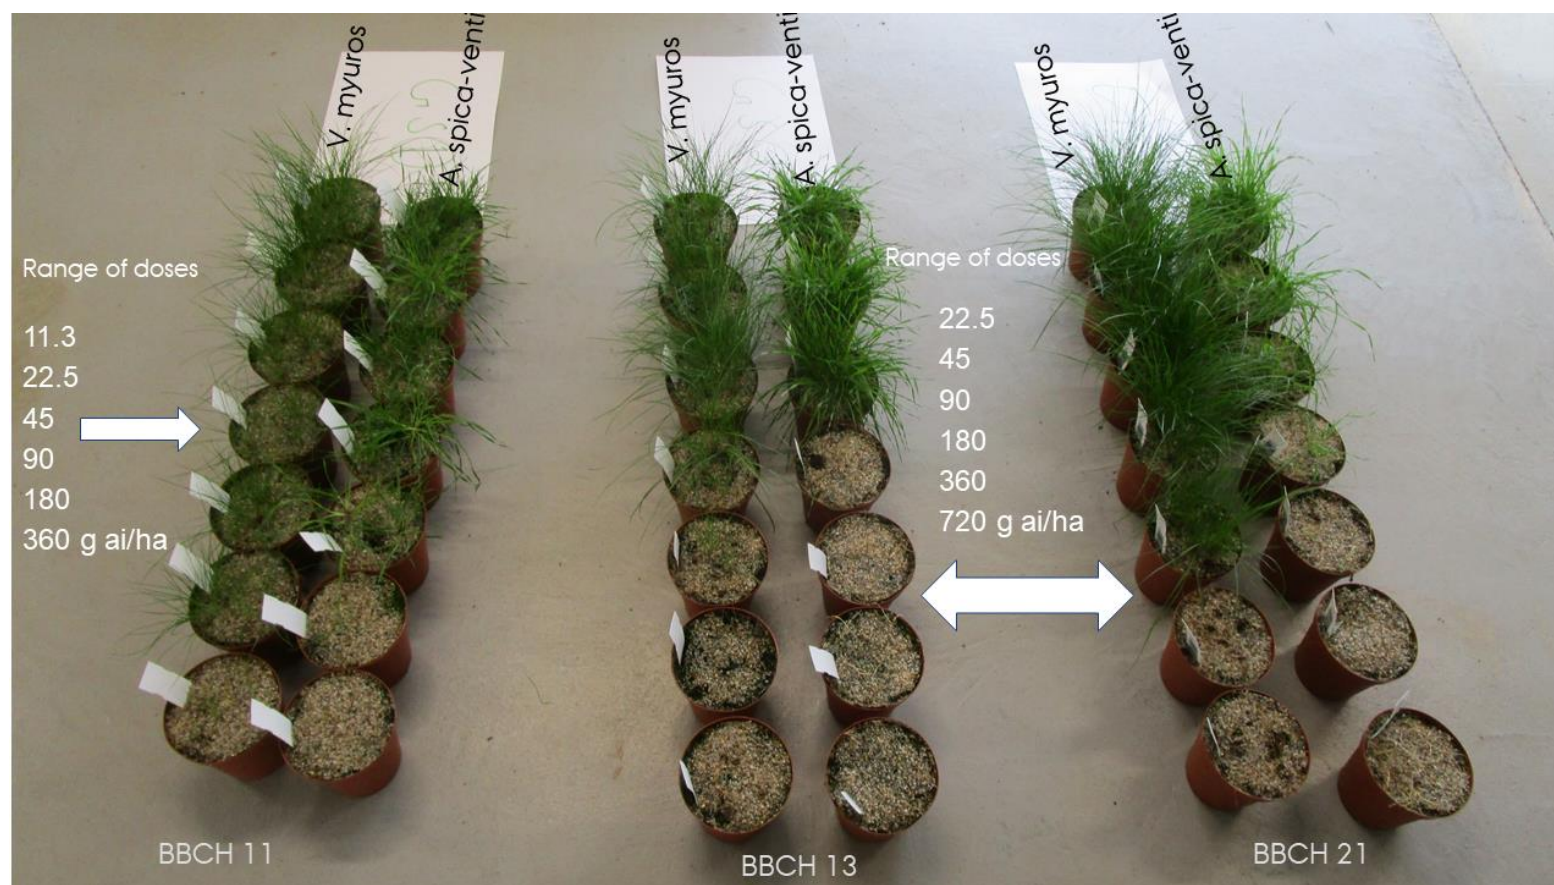

Supplement: s1 [file s1]
